# Supplementary material for: Development of an Antibody Delivery Method for Cancer Treatment by Combining Ultrasound with Therapeutic Antibody-Modified Nanobubbles Using Fc-Binding Polypeptide
Source: MDPI journal article supplement (doi:10.3390/pharmaceutics15010130), 2022-12-30
Supplement: s1 [file s1]

## Supplementary Materials

# Development of an Antibody Delivery Method for Cancer Treatment by Combining Ultrasound with Therapeutic Antibody-Modified Nanobubbles Using Fc-Binding Polypeptide

Yusuke Yano <sup>1,†</sup>, Nobuhito Hamano <sup>1,†</sup>, Kenshin Haruta <sup>1</sup>, Tomomi Kobayashi <sup>1</sup>, Masahiro Sato <sup>1</sup>, Yamato Kikkawa <sup>2</sup>, Yoko Endo-Takahashi <sup>1</sup>, Rui Tada <sup>1</sup>, Ryo Suzuki <sup>3</sup>, Kazuo Maruyama <sup>4</sup>, Motoyoshi Nomizu <sup>2</sup> and Yoichi Negishi <sup>1,\*</sup>

<sup>1</sup> Department of Drug Delivery and Molecular Biopharmaceutics, School of Pharmacy, Tokyo University of Pharmacy and Life Sciences, 1432-1 Horinouchi, Hachioji, Tokyo 192-0392, Japan

<sup>2</sup> Department of Clinical Biochemistry, School of Pharmacy, Tokyo University of Pharmacy and Life Sciences, Tokyo 192-0392, Japan

<sup>3</sup> Laboratory of Drug and Gene Delivery Research, Faculty of Pharma-Sciences, Teikyo University, 2-11-1 Kaga, Itabashi-ku, Tokyo 173-8605, Japan

<sup>4</sup> Laboratory of Ultrasound Theranostics, Faculty of Pharma-Sciences, Teikyo University, 2-11-1 Kaga, Itabashi-ku, Tokyo 173-8605, Japan

\* Correspondence: negishi@toyaku.ac.jp; Tel.: +81-42-676-3183

† These authors contributed equally to this work.

**Figure. S1** Experimental section

**ADCC activity of PEG-NBs after TUS exposure**

The preparation of PEG-NBs is same as the manuscript. SKOV3 ( $0.5 \times 10^4$  cells/ 100  $\mu$ L /well) were seeded onto a 96-well plate the day before observation and incubated overnight at 37°C in 5% CO<sub>2</sub>. The next day, after the removal of the medium, 25  $\mu$ L of assay buffer (RPMI 1640 containing 4% (v/v) low IgG FBS) was added to each well, and PEG-NBs (5  $\mu$ g as a Lipid) which was exposed to TUS were added. Then, Jurkat effector cells were added to the wells at a density of  $7.5 \times 10^4$  cells/ 25  $\mu$ L and incubated at 37°C in 5% CO<sub>2</sub> atmosphere. After 6 h, 75  $\mu$ L of Bio-Glo™ luciferase assay reagent was added to the wells and incubated at room temperature for 15 min. The resulting luminescence in the culture supernatants was measured using a Synergy HTX Multi-Mode Plate Reader (BioTek Instruments, Inc., Whiting, VT, USA). TUS condition is same as the manuscript.

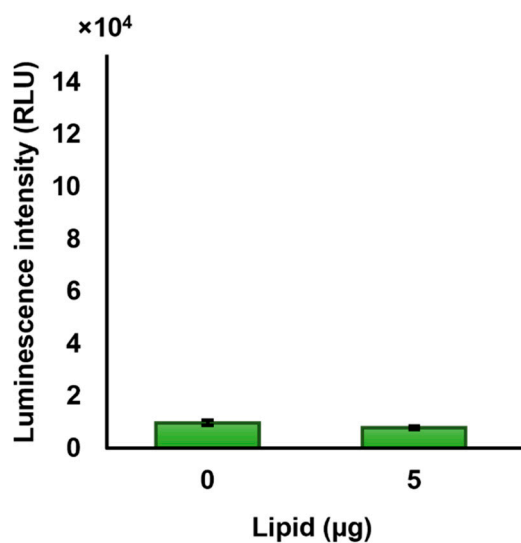

### Supplement Figure S1

#### Luminescence intensity of PEG-NBs exposed ultrasound

To evaluate the ADCC activity, luminescence intensity of Jurkat effector cells, expressing NFAT-RE-luc2, was measured by ADCC reporter bioassay against SKOV3 (T). SKOV3 cells were plated in a 96-well plate the before assay. On the day of assay, the samples and effector cells (E) were added to the plate (cell rate; E: T= 15: 1). After 6 h of incubation at 37°C/5% CO<sub>2</sub> condition, Bio-Glo™ luciferase assay reagent was added, and the luminescence intensity was determined using luminometer.
